# Supplementary material
Source: ML conference proceedings conference paper supplement (https://openaccess.thecvf.com/content/CVPR2023/html/Wang_Few-Shot_Learning_With_CVPR_2023_paper.html)
Supplement: Supplementary file 1 [file Wang_Few-Shot_Learning_With_CVPR_2023_supplemental.pdf]

# Few-Shot Learning with Selective Attack and Cross-Modal Distribution Alignment

## Supplementary Materials

### 1 Derivation of the EMD Upper Bound

In this work, the EMD can be written as [2]:

$$\text{EMD}(\mathbf{VLP}, \mathbf{LP}) = \sum_k \text{EMD}(\mathbf{v}_k, \mathbf{w}_k) = \sum_k \inf \mathbb{E} \|\mathbf{v}_k - \mathbf{w}_k\|, \quad (1)$$

which is the same as Eq. 10 in the manuscript, with  $\mathbf{v}_k \sim \mathcal{N}(\boldsymbol{\mu}_v^k, \boldsymbol{\Sigma}_v^k)$  and  $\mathbf{w}_k \sim \mathcal{N}(\boldsymbol{\mu}_w^k, \boldsymbol{\Sigma}_w^k)$ . According to [3], if we define:

$$\mathbf{w}_k = \boldsymbol{\mu}_w^k + \underbrace{\boldsymbol{\Sigma}_v^{k-\frac{1}{2}} \left( \boldsymbol{\Sigma}_v^{k\frac{1}{2}} \boldsymbol{\Sigma}_w^k \boldsymbol{\Sigma}_v^{k\frac{1}{2}} \right)^{\frac{1}{2}} \boldsymbol{\Sigma}_v^{k-\frac{1}{2}}}_{\mathbf{A}^k} (\mathbf{v}_k - \boldsymbol{\mu}_v^k), \quad (2)$$

since  $\mathbf{A}^k = (\mathbf{A}^k)^T$ ,

$$\mathbb{E}(\mathbf{w}_k) = \boldsymbol{\mu}_w^k + \mathbf{A}^k (\mathbb{E}(\mathbf{v}_k) - \boldsymbol{\mu}_v^k) = \boldsymbol{\mu}_w^k + \mathbf{A}^k (\boldsymbol{\mu}_v^k - \boldsymbol{\mu}_v^k) = \boldsymbol{\mu}_w^k, \quad (3)$$

and

$$\begin{aligned} \text{Var}(\mathbf{w}_k) &= \mathbf{A}^k \boldsymbol{\Sigma}_v^k (\mathbf{A}^k)^T \\ &= \boldsymbol{\Sigma}_v^{k-\frac{1}{2}} \left( \boldsymbol{\Sigma}_v^{k\frac{1}{2}} \boldsymbol{\Sigma}_w^k \boldsymbol{\Sigma}_v^{k\frac{1}{2}} \right)^{\frac{1}{2}} \boldsymbol{\Sigma}_v^{k-\frac{1}{2}} \boldsymbol{\Sigma}_v^k \boldsymbol{\Sigma}_v^{k-\frac{1}{2}} \left( \boldsymbol{\Sigma}_v^{k\frac{1}{2}} \boldsymbol{\Sigma}_w^k \boldsymbol{\Sigma}_v^{k\frac{1}{2}} \right)^{\frac{1}{2}} \boldsymbol{\Sigma}_v^{k-\frac{1}{2}} \\ &= \boldsymbol{\Sigma}_v^{k-\frac{1}{2}} \left( \boldsymbol{\Sigma}_v^{k\frac{1}{2}} \boldsymbol{\Sigma}_w^k \boldsymbol{\Sigma}_v^{k\frac{1}{2}} \right) \boldsymbol{\Sigma}_v^{k-\frac{1}{2}} \\ &= \boldsymbol{\Sigma}_w^k, \end{aligned} \quad (4)$$

then  $\mathbf{w}_k \sim \mathcal{N}(\boldsymbol{\mu}_w^k, \boldsymbol{\Sigma}_w^k)$ . With Eq. 2, we have

$$\begin{aligned} \mathbf{D}^k &= \mathbf{v}_k - \mathbf{w}_k \\ &= \mathbf{v}_k - \boldsymbol{\mu}_w^k - \mathbf{A}^k (\mathbf{v}_k - \boldsymbol{\mu}_v^k) \\ &= (\mathbf{I} - \mathbf{A}^k) \mathbf{v}_k - \boldsymbol{\mu}_w^k + \mathbf{A}^k \boldsymbol{\mu}_v^k, \end{aligned} \quad (5)$$

and the expectation of  $\mathbf{D}^k$  is

$$\mathbb{E}(\mathbf{D}^k) = \boldsymbol{\mu}_v^k - \boldsymbol{\mu}_w^k. \quad (6)$$

For simplicity, suppose  $\Sigma_v^k = \sigma_{v^k}^2 \mathbf{I}$  and  $\Sigma_w^k = \sigma_{w^k}^2 \mathbf{I}$ . Based on Jensen's inequality [1], we have:

$$\begin{aligned}
(\mathbb{E}\|\mathbf{D}^k\|)^2 &\leq \mathbb{E}(\|\mathbf{D}^k\|^2) \\
&= \left\| \boldsymbol{\mu}_v^k - \boldsymbol{\mu}_w^k \right\|^2 + \text{tr} \left( \Sigma_v^k + \Sigma_w^k - \mathbf{A}^k \Sigma_v^k - \Sigma_v^k \mathbf{A}^k \right) \\
&= \left\| \boldsymbol{\mu}_v^k - \boldsymbol{\mu}_w^k \right\|^2 + \text{tr} \left( \Sigma_v^k \right) + \text{tr} \left( \Sigma_w^k \right) - 2 \text{tr} \left( \Sigma_v^{k-\frac{1}{2}} \left( \Sigma_v^{k\frac{1}{2}} \Sigma_w^k \Sigma_v^{k\frac{1}{2}} \right)^{\frac{1}{2}} \Sigma_v^{k\frac{1}{2}} \right) \\
&= \left\| \boldsymbol{\mu}_v^k - \boldsymbol{\mu}_w^k \right\|^2 + \text{tr} \left( \Sigma_v^k \right) + \text{tr} \left( \Sigma_w^k \right) - 2 \text{tr} \left( \left( \Sigma_v^k \Sigma_w^k \right)^{\frac{1}{2}} \right) \\
&= \left\| \boldsymbol{\mu}_v^k - \boldsymbol{\mu}_w^k \right\|^2 + \left\| \Sigma_v^{k\frac{1}{2}} - \Sigma_w^{k\frac{1}{2}} \right\|^2. \tag{7}
\end{aligned}$$

Then  $\text{EMD}(\mathbf{VLP}, \mathbf{LP})$  can be derived as:

$$\begin{aligned}
\text{EMD}(\mathbf{VLP}, \mathbf{LP}) &= \sum_k \inf \mathbb{E} \|\mathbf{v}_k - \mathbf{w}_k\| \\
&= \sum_k \inf \mathbb{E} \|\mathbf{D}^k\| \\
&\leq \sum_k \inf (\mathbb{E} \|\mathbf{D}^k\|^2)^{\frac{1}{2}} \\
&= \sum_k \inf (\left\| \boldsymbol{\mu}_v^k - \boldsymbol{\mu}_w^k \right\|^2 + \left\| \Sigma_v^{k\frac{1}{2}} - \Sigma_w^{k\frac{1}{2}} \right\|^2)^{\frac{1}{2}}. \tag{8}
\end{aligned}$$

Finally, based on Eq. 8, we define the loss function as:

$$\mathcal{L}_{\text{EMD}} \triangleq \sum_k (\left\| \boldsymbol{\mu}_v^k - \boldsymbol{\mu}_w^k \right\|^2 + \left\| \Sigma_v^{k\frac{1}{2}} - \Sigma_w^{k\frac{1}{2}} \right\|^2). \tag{9}$$

## 2 Geometric Explanation of Cross-Modal Distribution Alignment

To give an intuitive analysis, we regard the feature space as 2-dimensional. In Fig. 1,  $\mathbf{z}_{i,j}$  is the feature of the current input image,  $\mathbf{w}_{y_i}$  is the text feature of class  $y_i$ ,  $\mathbf{v}_{y_i}$  is the current vision-language prototype of class  $y_i$ , and  $\mathbf{z}'_{i,j} = (1 - \alpha)\mathbf{z}_{i,j} + \alpha\mathbf{v}_{y_i}$  is the image feature calibrated (aligned) by  $\mathbf{v}_{y_i}$ . The circle with its center  $\mathbf{w}_{y_i}$  in Fig. 1 has the radius  $|\mathbf{w}_{y_i} - \mathbf{z}_{i,j}|$ . Since the target of the loss function  $\mathcal{L}_{\text{EMD}}$  is to align  $\mathbf{v}_{y_i}$  and  $\mathbf{w}_{y_i}$ , the prototype  $\mathbf{v}_{y_i}$  is usually closer to  $\mathbf{w}_{y_i}$  than  $\mathbf{z}_{i,j}$  after some iterations. It is easy to prove that as long as  $\mathbf{v}_{y_i}$  is inside the circle,  $\mathbf{z}'_{i,j}$  must be closer to  $\mathbf{w}_{y_i}$  than  $\mathbf{z}_{i,j}$ , meaning that after the alignment, the image feature  $\mathbf{z}_{i,j}$  becomes  $\mathbf{z}'_{i,j}$  that is closer to the text feature  $\mathbf{w}_{y_i}$ .

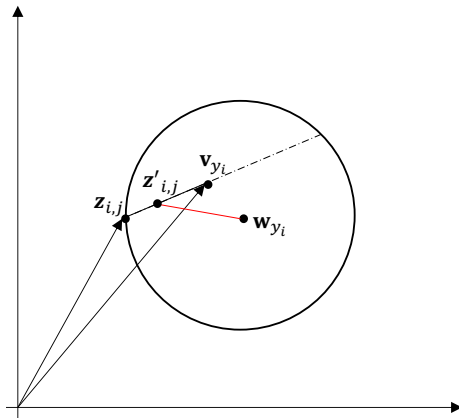

**Fig. 1.** Geometric explanation of why  $(1 - \alpha)\mathbf{z}_{i,j} + \alpha\mathbf{v}_{y_i}$  in Eq. 12 in the manuscript helps the alignment.

### 3 Datasets

The details of the 11 downstream datasets are shown in Table 1. The accuracy metric of each dataset follows CLIP [4].

| Dataset          | Classes | Train Size | Test Size | Accuracy Metric |
|------------------|---------|------------|-----------|-----------------|
| ImageNet         | 1000    | 1281167    | 50000     | accuracy        |
| CIFAR-10         | 10      | 50000      | 10000     | accuracy        |
| CIFAR-100        | 100     | 50000      | 10000     | accuracy        |
| STL-10           | 10      | 1000       | 8000      | accuracy        |
| Food-101         | 101     | 75750      | 25250     | accuracy        |
| Stanford Cars    | 196     | 8144       | 8041      | accuracy        |
| FGVC Aircraft    | 100     | 6667       | 3333      | mean per-class  |
| Oxford-IIIT Pets | 37      | 3680       | 3669      | mean per-class  |
| Caltech-101      | 102     | 3060       | 6086      | mean per-class  |
| DTD              | 47      | 3760       | 1880      | accuracy        |
| UCF-101          | 101     | 9537       | 1794      | accuracy        |

**Table 1.** Datasets in our experiments.

### 4 Results

Table 2 shows the detailed results of 5 methods with the same pre-trained CLIP model (vision encoder=ResNet50) on the 11 datasets. In addition to the methods in the manuscript, Linear Probe CLIP is also used for the evaluation. Our SADA outperforms the others.

| Method            | #Shots | Average     | ImageNet-lk | CIFAR10     | Caltech101  | Oxford Pets | Food101     | STL10       | UCF101      | DTD         | Stanford Cars | CIFAR100    | FGVC Aircraft |
|-------------------|--------|-------------|-------------|-------------|-------------|-------------|-------------|-------------|-------------|-------------|---------------|-------------|---------------|
| Linear Probe CLIP | 1      | 35.1        | 22.1        | 44.3        | 44.3        | 30.2        | 31.4        | 80.6        | 41.2        | 29.8        | 24.3          | 18.2        | 13.0          |
|                   | 2      | 44.9        | 31.9        | 53.5        | 68.7        | 40.5        | 45.1        | 86.9        | 53.8        | 41.4        | 36.8          | 26.6        | 17.9          |
|                   | 4      | 54.9        | 41.4        | 62.2        | 79.0        | 56.4        | 56.8        | 92.2        | 61.7        | 51.9        | 49.5          | 35.6        | 23.9          |
|                   | 8      | 62.6        | 49.4        | 70.1        | 84.3        | 67.5        | 67.1        | 94.3        | 67.2        | 59.0        | 61.2          | 43.6        | 29.4          |
|                   | 16     | 68.2        | 55.9        | 73.8        | 87.3        | 75.1        | 73.7        | 95.0        | 72.8        | 64.3        | 70.0          | 50.5        | 36.0          |
| CoOp              | 1      | 62.4        | 53.4        | 71.8        | 83.6        | 86.5        | 77.5        | 94.1        | 60.0        | 44.1        | 54.0          | 41.3        | 17.7          |
|                   | 2      | 63.8        | 55.7        | 73.2        | 84.2        | 86.7        | 76.4        | 76.4        | 64.2        | 48.4        | 57.0          | 42.4        | 19.9          |
|                   | 4      | 66.1        | 57.9        | 75.4        | 85.5        | 87.2        | 77.0        | 94.9        | 65.8        | 53.4        | 61.4          | 45.7        | 22.7          |
|                   | 8      | 68.6        | 60.5        | 76.7        | 87.4        | 87.8        | 77.8        | 95.3        | 70.0        | 58.7        | 65.5          | 49.7        | 26.3          |
|                   | 16     | 71.3        | 62.3        | 78.4        | 89.6        | 88.4        | 79.3        | 95.6        | 74.6        | 65.0        | 70.5          | 53.3        | 30.1          |
| CLIP-Adapter      | 1      | 64.0        | 58.3        | 73.6        | 86.1        | 86.8        | 77.9        | 94.3        | 64.1        | 45.3        | 54.3          | 43.2        | 19.8          |
|                   | 2      | 65.5        | 59.0        | 75.1        | 86.7        | 87.0        | 78.3        | 94.8        | 67.1        | 50.3        | 57.5          | 44.1        | 22.5          |
|                   | 4      | 67.5        | 59.7        | 76.5        | 88.5        | 87.3        | 78.5        | 95.2        | 70.0        | 56.0        | 61.8          | 46.3        | 25.3          |
|                   | 8      | 69.6        | 60.7        | 77.5        | 88.7        | 87.9        | 78.6        | 95.4        | 73.7        | 61.0        | 65.9          | 49.8        | 30.2          |
|                   | 16     | 72.2        | 61.3        | 79.1        | 90.1        | 88.5        | 79.3        | 95.6        | 76.7        | 65.8        | 71.0          | 52.9        | 38.0          |
| Tip-Adapter       | 1      | 65.9        | 61.3        | 75.2        | 89.7        | 87.3        | 77.7        | 94.4        | 64.8        | 50.3        | 58.4          | 43.9        | 21.7          |
|                   | 2      | 67.0        | 61.7        | 75.9        | 89.9        | 87.9        | 77.8        | 94.5        | 67.5        | 52.9        | 61.5          | 44.3        | 23.1          |
|                   | 4      | 69.0        | 62.5        | 77.3        | 91.5        | 88.3        | 78          | 94.6        | 71.2        | 58.0        | 64.4          | 46.9        | 26.2          |
|                   | 8      | 71.2        | 64          | 77.7        | 92          | 89.1        | 78.4        | 94.8        | 74.8        | 61.7        | 68.8          | 48.4        | 33.8          |
|                   | 16     | 73.4        | 65.5        | 78.5        | 93.1        | 89.3        | 78.9        | 94.9        | 77.5        | 66.2        | 75.6          | 49.5        | 38.7          |
| ProDA             | 1      | 66.8        | 61.8        | 74.6        | 86.7        | 88.2        | 80.8        | 95.1        | 66.4        | 50.9        | 60.1          | 47.8        | 22.2          |
|                   | 2      | 68.4        | 62.3        | 76.4        | 87.1        | 88.4        | 80.6        | 95.3        | 68.7        | 56.2        | 63.7          | 49.4        | 24.8          |
|                   | 4      | 70.3        | 63.6        | 78.3        | 88.7        | 89.0        | 80.8        | 95.7        | 71.5        | 60.0        | 67.9          | 51.7        | 27.5          |
|                   | 8      | 72.3        | 64.7        | 79.6        | 89.8        | 89.4        | 81.7        | 96.1        | 74.7        | 64.0        | 72.1          | 54.3        | 31.5          |
|                   | 16     | 74.3        | 65.3        | 80.9        | 90.0        | 90.0        | 82.4        | 96.3        | 77.3        | 68.7        | 75.5          | 57.0        | 36.6          |
| SADA              | 1      | <b>68.7</b> | <b>63.9</b> | <b>78.0</b> | <b>90.6</b> | <b>89.2</b> | <b>81.9</b> | <b>95.8</b> | <b>69.2</b> | <b>51.8</b> | <b>61.7</b>   | <b>49.3</b> | <b>23.9</b>   |
|                   | 2      | <b>69.9</b> | <b>64.3</b> | <b>78.7</b> | <b>91.4</b> | <b>89.4</b> | <b>82.1</b> | <b>96.0</b> | <b>69.9</b> | <b>57.7</b> | <b>64.5</b>   | <b>50.0</b> | <b>25.3</b>   |
|                   | 4      | <b>71.9</b> | <b>65.5</b> | <b>80.0</b> | <b>93.7</b> | <b>89.5</b> | <b>82.5</b> | <b>96.2</b> | <b>72.7</b> | <b>61.5</b> | <b>68.4</b>   | <b>52.6</b> | <b>28.3</b>   |
|                   | 8      | <b>74.1</b> | <b>66.9</b> | <b>80.9</b> | <b>93.2</b> | <b>89.9</b> | <b>82.7</b> | <b>96.3</b> | <b>75.9</b> | <b>65.0</b> | <b>73.6</b>   | <b>55.0</b> | <b>31.9</b>   |
|                   | 16     | <b>76.2</b> | <b>67.7</b> | <b>81.8</b> | <b>94.5</b> | <b>90.7</b> | <b>83.1</b> | <b>96.5</b> | <b>78.5</b> | <b>69.9</b> | <b>76.2</b>   | <b>57.9</b> | <b>37.2</b>   |

**Table 2.** Accuracies (%) by 5 methods. #Shots: the number of training samples per class.

## References

1. Chandler, D.: Introduction to modern statistical. In: Mechanics. Oxford University Press, Oxford, UK. vol. 5, p. 449 (1987)
2. Clement, P., Desch, W.: An elementary proof of the triangle inequality for the wasserstein metric. In: Proceedings of the American Mathematical Society. vol. 136, pp. 333–339 (2008)
3. Knott, M., Smith, C.S.: On the optimal mapping of distributions **43**, 39–49 (1984)
4. Radford, A., Kim, J.W., Hallacy, C., Ramesh, A., Goh, G., Agarwal, S., Sastry, G., Askell, A., Mishkin, P., Clark, J., et al.: Learning transferable visual models from natural language supervision. In: ICML (2021)
